# Supplementary material for: Five-year drug survival and discontinuation reasons for eight biological disease-modifying antirheumatic drugs for rheumatoid arthritis: A retrospective analysis of 1,182 patients from the Niigata Orthopedic Surgery Rheumatoid Arthritis Database (NOSRAD)
Source: Research Square preprint supplement (doi:10.21203/rs.3.rs-7930489/v1), 2025-12-22
Supplement: Supplementary file 1 [file c07940940bbf7be35718d663.docx]

|  | IFX (*n*＝74) | ETN (*n*＝280) | TCZ (*n*＝390) | ADA (*n*＝86) | ABT (*n*＝145) | GLM (*n*＝95) | CZP (*n*＝53) | SAR (*n*＝59) | p-value |
| --- | --- | --- | --- | --- | --- | --- | --- | --- | --- |
| Women, *n* (%) | 57 (77.0) | 236 (84.3) | 305 (78.2) | 60 (69.8) | 115 (79.3) | 77 (81.1) | 44 (83.0) | 43 (72.9) | .106 |
| Age (years), mean ± SD | 55.6 ± 15.1 | 56.1 ± 15.4 | 57.6 ± 15.8 | 56.9 ± 13.7 | 70.3 ± 11.5 | 67.4 ± 13.5 | 56.5 ± 14.4 | 62.9 ± 14.3 | <.001 |
| Disease duration (years), mean ± SD | 9.5 ± 9.6 | 11.0 ± 9.6 | 9.1 ± 9.7 | 10.9 ± 9.8 | 13.3 ± 12.3 | 15.3 ± 11.1 | 8.9 ± 9.2 | 11.7 ± 8.5 | <.001 |
| DAS28-ESR, mean ± SD | 4.24 ± 1.3 | 3.83 ± 1.33 | 3.60 ± 1.39 | 3.30 ± 1.18 | 4.60 ± 1.36 | 2.96 ± 0.97 | 2.73 ± 1.14 | 3.58 ± 1.43 | <.001 |
| MTX use, *n* (%) | 69 (93.2) | 177 (63.2) | 181 (46.4) | 67 (77.9) | 54 (37.2) | 69 (72.6) | 30 (56.6) | 25 (42.4) | <.001 |
| MTX dose (mg/week), mean ± SD | 7.5 ± 1.9 | 7.3 ± 2.0 | 7.6 ± 2.3 | 8.0 ± 2.4 | 7.1 ± 2.9 | 7.5 ± 2.7 | 7.6 ± 2.2 | 6.9 ± 2.7 | .199 |
| PSL use, *n* (%) | 34 (46.0) | 142 (50.7) | 160 (41.0) | 35 (40.7) | 84 (57.9) | 50 (52.6) | 21 (39.6) | 32 (54.2) | .005 |
| PSL dose (mg/day), mean ± SD | 7.5 ± 8.8 | 6.6 ± 5.1 | 7.7 ± 7.1 | 5.1 ± 2.4 | 6.3 ± 5.1 | 4.5 ± 2.4 | 5.1 ± 2.4 | 5.4 ± 3.9 | .001 |
| Naïve, *n* (%) | 64 (86.5) | 217 (77.5) | 253 (64.9) | 62 (72.1) | 89 (61.4) | 62 (65.3) | 26 (49.1) | 11 (18.6) | <.001 |
| Switch, *n* (%) | 10 (13.5) | 63 (22.5) | 137 (35.1) | 24 (27.9) | 56 (38.6) | 33 (34.7) | 27 (50.9) | 48 (81.4) | <.001 |
| 2nd bio, *n* (%) | 2 (2.7) | 34 (12.1) | 90 (23.1) | 10 (11.6) | 32 (22.1) | 23 (24.2) | 13 (24.5) | 20 (33.9) | <.001 |
| 3rd bio, *n* (%) | 3 (4.1) | 16 (5.7) | 29 (7.4) | 7 (8.1) | 13 (9.0) | 5 (5.3) | 5 (9.4) | 15 (25.4) | <.001 |
| ≧4th bio, *n* (%) | 5 (6.8) | 13 (4.6) | 18 (4.6) | 7 (8.1) | 11 (7.6) | 5 (5.3) | 9 (17.0) | 13 (25.4) | <.001 |

Supplementary Table S1. Baseline characteristics of all patients (n = 1,184)

IFX, infliximab; ETN, etanercept; TCZ, tocilizumab; ADA, adalimumab; ABT, abatacept; GLM, golimumab; CZP, certolizumab pegol; SAR, sarilumab; DAS28-ESR, the 28-joint Disease Activity Score with erythrocyte sedimentation rate; MTX, methotrexate; PSL, prednisolone; bio, biologic agent; SD, standard deviation.

| Multivariable | HR | 95% CI | p-value |
| --- | --- | --- | --- |
| Sex | 1.25 | 0.97–1.61 | .084 |
| Age | 1.00 | 0.99–1.01 | .495 |
| Disease duration | 1.00 | 0.99–1.01 | .745 |
| DAS28-ESR | 0.91 | 0.84–0.98 | .015 |
| MTX | 0.86 | 0.69–1.10 | .202 |
| PSL | 1.22 | 0.99–1.49 | .059 |

Supplementary Table S2. Multivariable Cox proportional hazards model for treatment discontinuation in all patients, stratified by drug

Differences between drugs were assessed using the Cox-P value.

HR, hazard ratio; 95%CI, 95% confidence interval; DAS28-ESR, the 28-joint Disease Activity Score with erythrocyte sedimentation rate; MTX, methotrexate; PSL, prednisolone.

| Multivariable | HR | 95% CI | p-value |
| --- | --- | --- | --- |
| Sex | 0.89 | 0.56-1.42 | .634 |
| Age | 1.01 | 0.99-1.02 | .344 |
| Disease duration | 0.99 | 0.97-1.01 | .149 |
| DAS28-ESR | 0.99 | 0.86-1.14 | .920 |
| MTX | 1.06 | 0.68-1.68 | .789 |
| PSL | 1.15 | 0.79-1.67 | .478 |

Supplementary Table S3. Multivariable Cox proportional hazards model for treatment discontinuation in switch patients, stratified by drug.

Differences between drugs were assessed using the Cox-P value.

HR, hazard ratio; 95%CI, 95% confidence interval; DAS28-ESR, the 28-joint Disease Activity Score with erythrocyte sedimentation rate; MTX, methotrexate; PSL, prednisolone.

Supplementary Table S4. Detailed reasons for treatment discontinuation of each bDMARDs in 1,182 patients

|  | IFX (*n*＝74) | ETN (*n*＝280) | TCZ (*n*＝390) | ADA (*n*＝86) | ABT (*n*＝145) | GLM (*n*＝95) | CZP (*n*＝53) | SAR (*n*＝59) | p-value |
| --- | --- | --- | --- | --- | --- | --- | --- | --- | --- |
| Inadequate response | 30 (40.5) | 96 (34.3) | 65 (16.7) | 33 (38.4) | 33 (22.8) | 27 (28.4) | 22 (41.5) | 14 (23.7) | <.001 |
| Adverse events | 15 (20.3) | 56 (20.0) | 65 (16.7) | 15 (17.4) | 19 (13.1) | 16 (16.8) | 13 (24.5) | 5 (8.5) | .256 |
| Infections | 3 (4.1) | 27 (9.6) | 29 (7.4) | 3 (3.5) | 8 (5.5) | 4 (4.2) | 5 (9.4) | 0 | .082 |
| Pulmonary disorders | 0 | 5 (1.8) | 3 (0.8) | 1 (1.2) | 3 (2.1) | 0 | 0 | 0 | .495 |
| Liver disorders | 0 | 3 (1.1) | 4 (1.0) | 1 (1.2) | 0 | 1 (1.1) | 0 | 0 | .830 |
| Skin disorders | 2 (2.7) | 1 (0.4) | 9 (2.3) | 7 (8.1) | 1 (0.7) | 5 (5.3) | 1 (1.9) | 2 (3.4) | .002 |
| Cardiovascular disease | 0 | 1 (0.4) | 4 (1.0) | 0 | 2 (1.4) | 0 | 0 | 0 | .633 |
| Malignant tumor | 3 (4.1) | 2 (0.7) | 3 (0.8) | 1 (1.2) | 1 (0.7) | 3 (3.2) | 2 (3.8) | 0 | .084 |
| Others | 7 (9.5) | 17 (6.1) | 13 (3.3) | 2 (2.3) | 4 (2.8) | 3 (3.2) | 5 (9.4) | 3 (5.1) | .091 |
| Remission/good response | 2 (2.7) | 15 (5.4) | 14 (3.6) | 6 (7.0) | 1 (0.7) | 2 (2.1) | 2 (3.8) | 1 (1.7) | .180 |
| Patient desire | 0 | 10 (3.6) | 13 (3.3) | 0 | 6 (4.1) | 2 (2.1) | 1 (1.9) | 1 (1.7) | .409 |
| Transfer to another hospital | 15 (20.3) | 64 (22.9) | 47 (12.1) | 5 (5.8) | 13 (9.0) | 16 (16.8) | 2 (3.8) | 5 (8.5) | <.001 |
| Other reasons | 1 (1.4) | 3 (1.1) | 3 (0.8) | 0 | 0 | 3 (3.2) | 1 (1.9) | 0 | .277 |
| Unknown | 4 (5.4) | 4 (1.4) | 22 (5.6) | 5 (5.8) | 7 (4.8) | 1 (1.1) | 1 (1.9) | 1 (1.7) | .072 |

Values are presented as n (percent).

bDMARDs, biological disease-modifying antirheumatic drugs; IFX, infliximab; ETN, etanercept; TCZ, tocilizumab; ADA, adalimumab; ABT, abatacept; GLM, golimumab; CZP, certolizumab pegol; SAR, sarilumab.

Supplementary Figure S1

Supplementary Figure S2
